# Supplementary material
Source: PubMed Central journal article supplement (PMC5546207)

## Supplement to:

### A Phase 1b dose-escalation study of encorafenib (LGX818) and cetuximab with or without alpelisib in metastatic *BRAF*-mutant colorectal cancer

#### Tables

**Table S1.** Pharmacokinetic parameters of encorafenib and alpelisib in patients at steady state (cycle 2 day 1).

| Treatment                                               | C <sub>max</sub> (ng/mL)* | T <sub>max</sub> (h) <sup>†</sup> | AUC <sub>tau</sub> (h.ng/mL)* |
|---------------------------------------------------------|---------------------------|-----------------------------------|-------------------------------|
| Encorafenib PK in the dual-combination therapy group:   |                           |                                   |                               |
| 100 mg encorafenib (n = 2; 2; 2) <sup>‡</sup>           | 1507±768                  | 2 (1–2)                           | 7662±2611                     |
| 200 mg encorafenib (n = 6; 6; 6)                        | 1427±824                  | 2 (1–4)                           | 7172±2888                     |
| 400 mg encorafenib (n = 8; 8; 7)                        | 3803±1314                 | 2 (1–4)                           | 15300±5640                    |
| 450 mg encorafenib (n = 6; 6; 5)                        | 5153±2564                 | 2 (1–2)                           | 16946±5757                    |
| Encorafenib PK in the triple-combination therapy group: |                           |                                   |                               |
| 200 mg encorafenib + 100 mg alpelisib (n = 3; 3; 3)     | 1552±534                  | 2 (1–2)                           | 6308±1190                     |
| 200 mg encorafenib + 200 mg alpelisib (n = 7; 7; 6)     | 2427±2143                 | 2 (1–6)                           | 11079±3822                    |
| 200 mg encorafenib + 300 mg alpelisib (n = 8; 8; 7)     | 2394±2077                 | 3 (1–8)                           | 12948±10649                   |
| 300 mg encorafenib + 200 mg alpelisib (n = 3; 3; 1)     | 1595±876                  | 2 (2–4)                           | 5998                          |
| Alpelisib PK in the triple-combination therapy group:   |                           |                                   |                               |
| 100 mg alpelisib + 200 mg encorafenib (n = 3; 3; 2)     | 680±93                    | 2 (1–4)                           | 5458±236                      |
| 200 mg alpelisib + 200 mg encorafenib (n = 7; 7; 4)     | 2057±717                  | 4 (1–6)                           | 19673±2361                    |
| 300 mg alpelisib + 200 mg encorafenib (n = 8; 8; 7)     | 2743±520                  | 4 (2–6)                           | 25126±3513                    |
| 200 mg alpelisib + 300 mg encorafenib (n = 4; 4; 2)     | 1562±816                  | 4 (4–8)                           | 11179±3830                    |

\*Arithmetic mean ± standard deviation.

<sup>†</sup>Median (minimum – maximum) value.

<sup>‡</sup>Number of patients for C<sub>max</sub>, T<sub>max</sub>, AUC<sub>tau</sub>, respectively. Some patients only had C<sub>max</sub> and T<sub>max</sub>, and AUC<sub>tau</sub> could not be calculated (Phoenix PK software; version 6.2; Pharsight, St. Louis, MO) due to a lack of sufficient PK data.

Abbreviations: AUC<sub>tau</sub>, area under the plasma concentration time curve for a dosing interval; C<sub>max</sub>, maximum serum concentration; PK, pharmacokinetics; T<sub>max</sub>, time of maximum serum concentration.

**Table S2.** Criteria for defining dose-limited toxicities

| <b>Toxicity</b>                                                | <b>Any of the following criteria</b>                                                                                                                                                                                                                                                                                                                                                                                                                     |
|----------------------------------------------------------------|----------------------------------------------------------------------------------------------------------------------------------------------------------------------------------------------------------------------------------------------------------------------------------------------------------------------------------------------------------------------------------------------------------------------------------------------------------|
| Blood and lymphatic disorders*                                 | <ul style="list-style-type: none"> <li>• Febrile neutropenia (absolute neutrophil count <math>&lt;1.0 \times 10^9/L</math> with fever <math>\geq 38.5^\circ C</math>)<sup>†</sup></li> </ul>                                                                                                                                                                                                                                                             |
| Blood investigations                                           | <ul style="list-style-type: none"> <li>• Grade 3 absolute neutrophil count for <math>&gt;7</math> consecutive days or grade 4 absolute neutrophil count</li> <li>• Grade 3 platelet count for <math>&gt;7</math> consecutive days and/or with signs of bleeding or grade 4 platelet count</li> </ul>                                                                                                                                                     |
| Skin and subcutaneous disorders                                | <ul style="list-style-type: none"> <li>• Grade 3 rash/photosensitivity/hand-foot skin reaction (HFSR) for <math>&gt;7</math> consecutive days despite skin toxicity treatment or grade 4 rash/photosensitivity/HFSR</li> </ul>                                                                                                                                                                                                                           |
| Metabolism and nutrition disorders <sup>‡</sup>                | <ul style="list-style-type: none"> <li>• Grade 2 hyperglycemia that does not resolve to grade 0 within 14 consecutive days (after initiation of oral antidiabetic treatment)</li> <li>• Grade 3 hyperglycemia for <math>&gt;7</math> consecutive days despite oral antidiabetic treatment</li> <li>• Grade 4 hyperglycemia or hyperglycemia that leads to diabetic ketoacidosis, hospitalization for IV insulin infusion, or non-ketotic coma</li> </ul> |
| Gastrointestinal disorders                                     | <ul style="list-style-type: none"> <li>• <math>\geq</math>grade 3 vomiting or nausea or diarrhea lasting more than 48 h despite optimal therapy</li> <li>• <math>\geq</math>grade 3 pancreatitis</li> </ul>                                                                                                                                                                                                                                              |
| Renal investigations                                           | <ul style="list-style-type: none"> <li>• <math>\geq</math>grade 3 serum creatinine</li> </ul>                                                                                                                                                                                                                                                                                                                                                            |
| Hepatic investigations <sup>§</sup>                            | <ul style="list-style-type: none"> <li>• <math>\geq</math>grade 3 blood bilirubin</li> <li>• AST or ALT <math>\geq 3 \times</math> ULN in conjunction with blood bilirubin <math>\geq 2 \times</math> ULN of any duration</li> <li>• Grade 3 AST or ALT for <math>&gt;7</math> consecutive days or grade 4 AST or ALT</li> <li>• Grade 4 serum alkaline phosphatase for <math>&gt;7</math> consecutive days</li> </ul>                                   |
| Metabolic investigations                                       | <ul style="list-style-type: none"> <li>• Grade 3 lipase and/or serum amylase for <math>&gt;7</math> consecutive days or grade 4 lipase and/or serum amylase</li> </ul>                                                                                                                                                                                                                                                                                   |
| Vascular disorders                                             | <ul style="list-style-type: none"> <li>• <math>\geq</math>grade 3 persistent hypertension requiring more than one drug or more intensive therapy than previously</li> </ul>                                                                                                                                                                                                                                                                              |
| Cardiac disorders                                              | <ul style="list-style-type: none"> <li>• <math>\geq</math>grade 3</li> </ul>                                                                                                                                                                                                                                                                                                                                                                             |
| Tumor lysis syndrome (TLS)                                     | <ul style="list-style-type: none"> <li>• <math>\geq</math>grade 4 TLS (life-threatening)**</li> </ul>                                                                                                                                                                                                                                                                                                                                                    |
| General disorders                                              | <ul style="list-style-type: none"> <li>• Grade 3 fatigue for <math>&gt;7</math> consecutive days</li> <li>• <math>\geq</math>grade 3 edema for <math>&gt;14</math> consecutive days</li> </ul>                                                                                                                                                                                                                                                           |
| Ophthalmologic disorders                                       | <ul style="list-style-type: none"> <li>• Grade 3 retinopathy/uveitis for <math>&gt;21</math> days or grade 4 retinopathy/uveitis confirmed by ophthalmologic examination</li> <li>• Any grade retinal vein occlusion</li> <li>• Any other eye disorders of grade 3 for <math>&gt;14</math> days or grade 4</li> </ul>                                                                                                                                    |
| Any other AE (excluding squamous cell carcinoma) <sup>††</sup> | <ul style="list-style-type: none"> <li>• <math>\geq</math>grade 3</li> </ul>                                                                                                                                                                                                                                                                                                                                                                             |

\* $\geq$ grade 3 anemia was not considered a DLT unless judged to be a hemolytic process secondary to study drug.  $\geq$ grade 3 lymphopenia was not considered a DLT unless clinically significant.

<sup>†</sup>Not according to CTCAEv4.0.

<sup>‡</sup>Hyperglycemia occurring during corticosteroids administration was only considered a DLT if not resolved within 2 days after the end of corticosteroid treatment.

<sup>§</sup>For any grade  $\geq 3$  hepatic toxicity that did not resolve within 7 days to  $\leq$ grade 1 (or  $\leq$ grade 2 if liver infiltration with tumor present), an abdominal CT scan was performed to assess if it was related to disease progression.

\*\*All patients diagnosed with TLS were discussed with the sponsor as soon as possible after the diagnosis.

<sup>††</sup>An AE was required to be clinically significant to be defined as a DLT: study drug-related fever, alkaline phosphatase elevation, electrolyte abnormalities (including K, NA, Cl, HCO<sub>3</sub>, Mg, Ca, PO<sub>4</sub>) were not considered a DLT unless clinically significant. Squamous cell carcinoma has been reported as an on-target side effect of BRAF inhibitors that is manageable and will not be considered a DLT. Cetuximab-induced infusion reactions will not be considered a DLT.

Abbreviations: AE, adverse event; ALT, alanine aminotransferase; AST, aspartate aminotransferase; CT, computed tomography; DLT, dose-limiting toxicity; ULN, upper limit of normal.

**Figures**

**Figure 1. Radiological images of response for a patient treated with the dual-combination therapy of encorafenib and cetuximab A) at baseline, B) after 6 weeks of treatment: PR (-40%), and C) after 10 weeks of treatment: confirmed PR (-45%).**

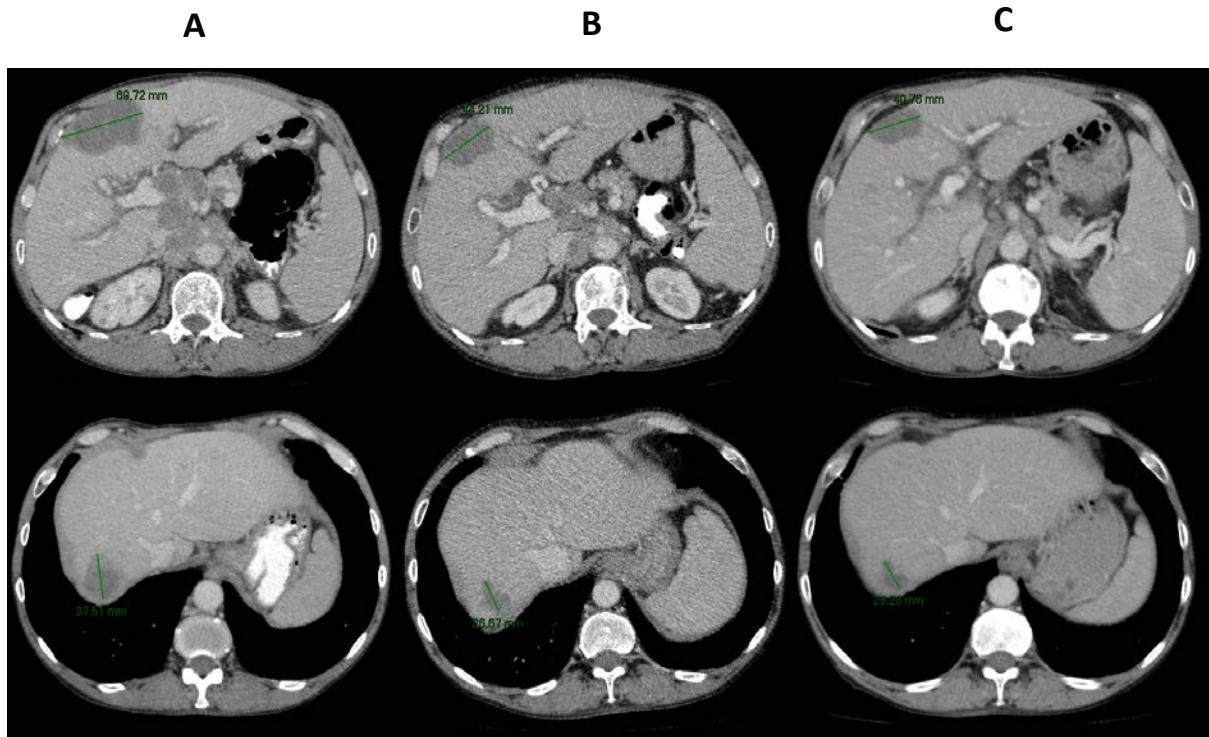

**Figure 2. Time on study by response for A) patients treated with the dual-combination therapy of encorafenib and cetuximab and B) patients treated with the triple-combination therapy of encorafenib, alpelisib, and cetuximab**

A)

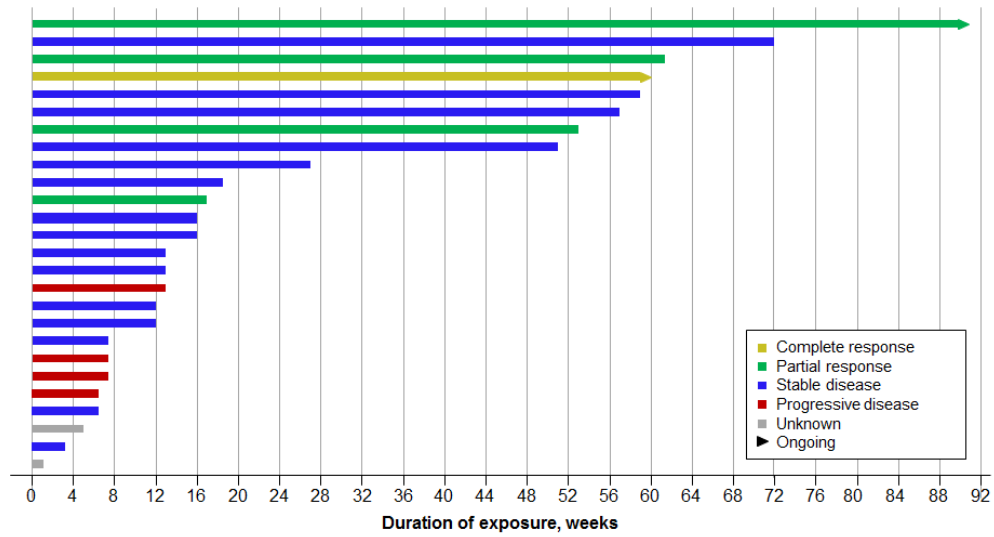

B)

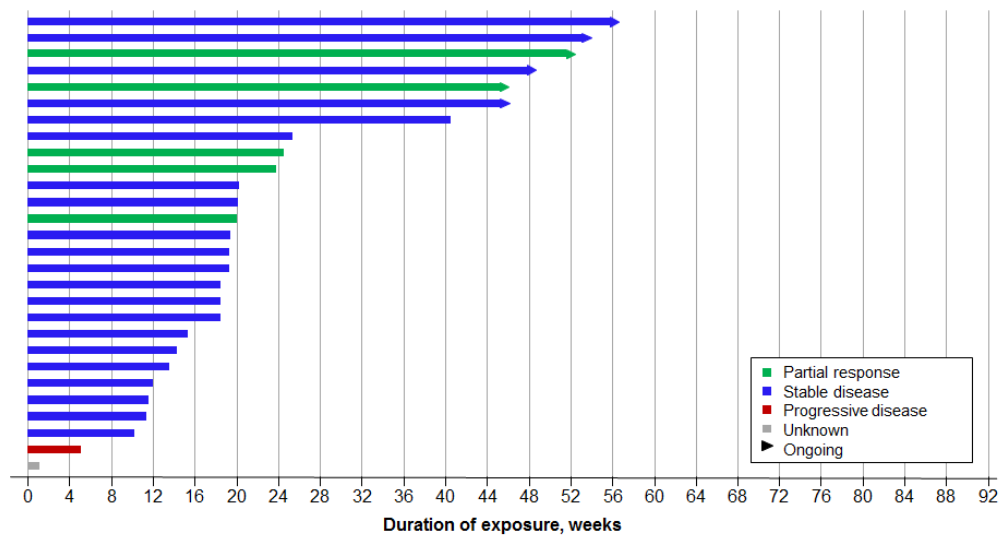

Supplement: NIHMS876187-supplement-supplementary_data.pdf [file NIHMS876187-supplement-supplementary_data.pdf]
